# Supplementary material for: Multiple eco-regions contribute to the seasonal cycle of Antarctic aerosol size distributions
Source: Copernicus journal article supplement (doi:10.5194/acp-25-1145-2025), 2025-01-28
Supplement: Supplementary file 1 [file acp-25-1145-2025-supplement.pdf]

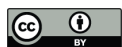

*Supplement of*

## **Multiple eco-regions contribute to the seasonal cycle of Antarctic aerosol size distributions**

**James Brean et al.**

*Correspondence to:* Manuel Dall'Osto ([dallosto@icm.csic.es](mailto:dallosto@icm.csic.es))

The copyright of individual parts of the supplement might differ from the article licence.

Table S1: Percentage of the total number of measurements corresponding to each of the 16 original clusters at each site

|                        | <b>Marambio</b> | <b>King Sejong</b> | <b>Halley</b> | <b>Dome C</b> |
|------------------------|-----------------|--------------------|---------------|---------------|
| <b>Nucleation slow</b> | 4.7             | 1.6                | 0.6           | 0.0           |
| <b>Nucleation fast</b> | 8.3             | 1.9                | 0.9           | 0.7           |
| <b>Nucleation weak</b> | 12.2            | 4.5                | 1.2           | 1.4           |
| <b>Bursting strong</b> | 8.7             | 11.3               | 2.8           | 4.1           |
| <b>Bursting weak</b>   | 14.2            | 8.7                | 0.6           | 0.7           |
| <b>Aitken high 30</b>  | 8.3             | 13.2               | 5.2           | 5.5           |
| <b>Aitken high 35</b>  | 1.2             | 4.8                | 3.1           | 7.6           |
| <b>Aitken high 25</b>  | 11.0            | 3.5                | 3.1           | 0.0           |
| <b>Aitken low 35</b>   | 7.1             | 9.7                | 11.3          | 9.7           |
| <b>Aitken low 45</b>   | 2.4             | 3.2                | 8.9           | 9.7           |
| <b>Aitken low 55</b>   | 0.4             | 0.6                | 9.2           | 14.5          |
| <b>Bimodal 1</b>       | 3.1             | 12.9               | 3.1           | 3.4           |
| <b>Bimodal 2</b>       | 1.6             | 3.5                | 4.9           | 30.3          |
| <b>Pristine 65</b>     | 10.6            | 11.9               | 12.0          | 5.5           |
| <b>Pristine 85</b>     | 3.9             | 6.8                | 21.2          | 3.4           |
| <b>Pristine 160</b>    | 2.4             | 1.6                | 12.0          | 3.4           |

Table S2: Percentage of the total number of measurements corresponding to each of 6 clusters at each site

| <b>Category</b>    | <b>Marambio</b> | <b>King Sejong</b> | <b>Halley</b> | <b>Dome C</b> |
|--------------------|-----------------|--------------------|---------------|---------------|
| <b>Nucleation</b>  | 25.2            | 8.1                | 2.8           | 2.1           |
| <b>Bursting</b>    | 22.8            | 20.0               | 3.4           | 4.8           |
| <b>Aitken low</b>  | 9.8             | 13.5               | 29.4          | 33.8          |
| <b>Aitken high</b> | 20.5            | 21.6               | 11.3          | 13.1          |
| <b>Bimodal</b>     | 4.7             | 16.5               | 8.0           | 33.8          |
| <b>Pristine</b>    | 16.9            | 20.3               | 45.1          | 12.4          |

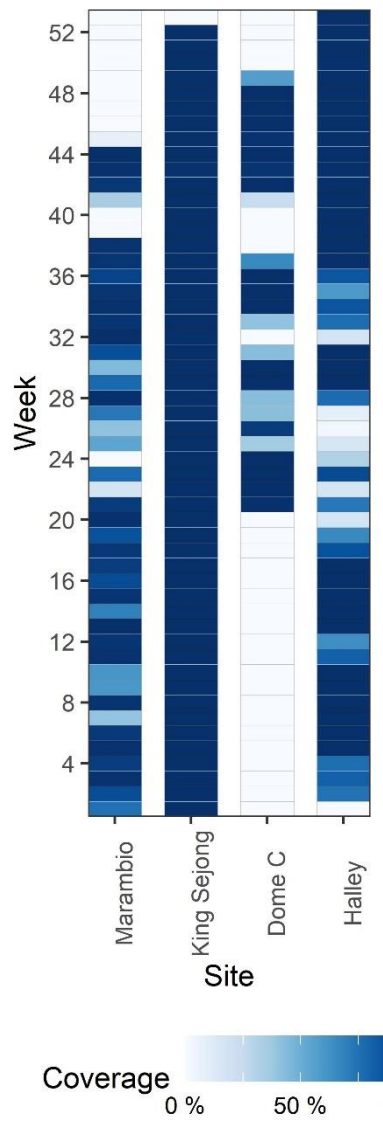

Figure S1: Data coverage per week for each of the four Antarctic sites.

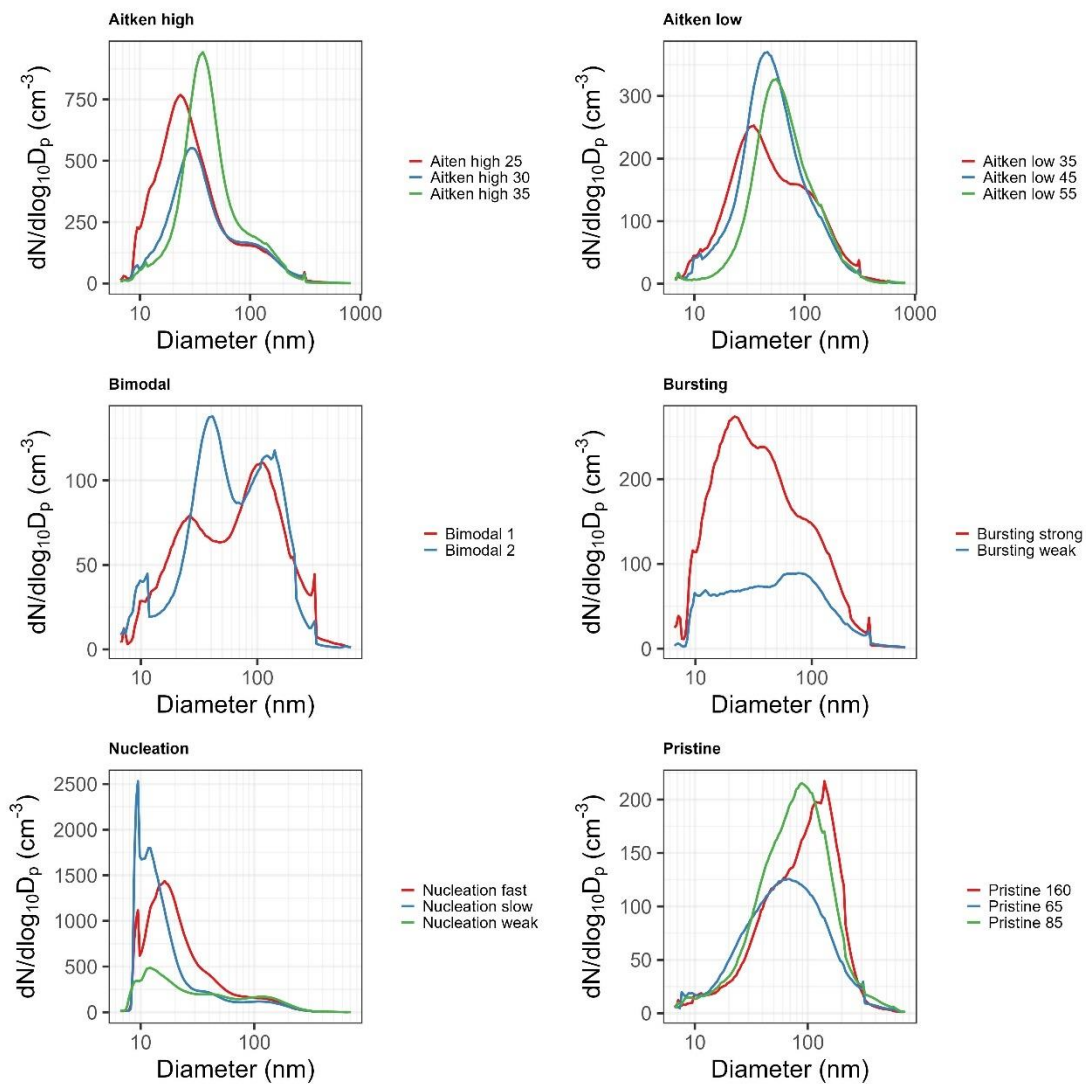

Figure S2: Mean PNSD for each of the 16 clusters produced by cluster analysis. Each panel represents a group into which these were then compiled for later analyses.

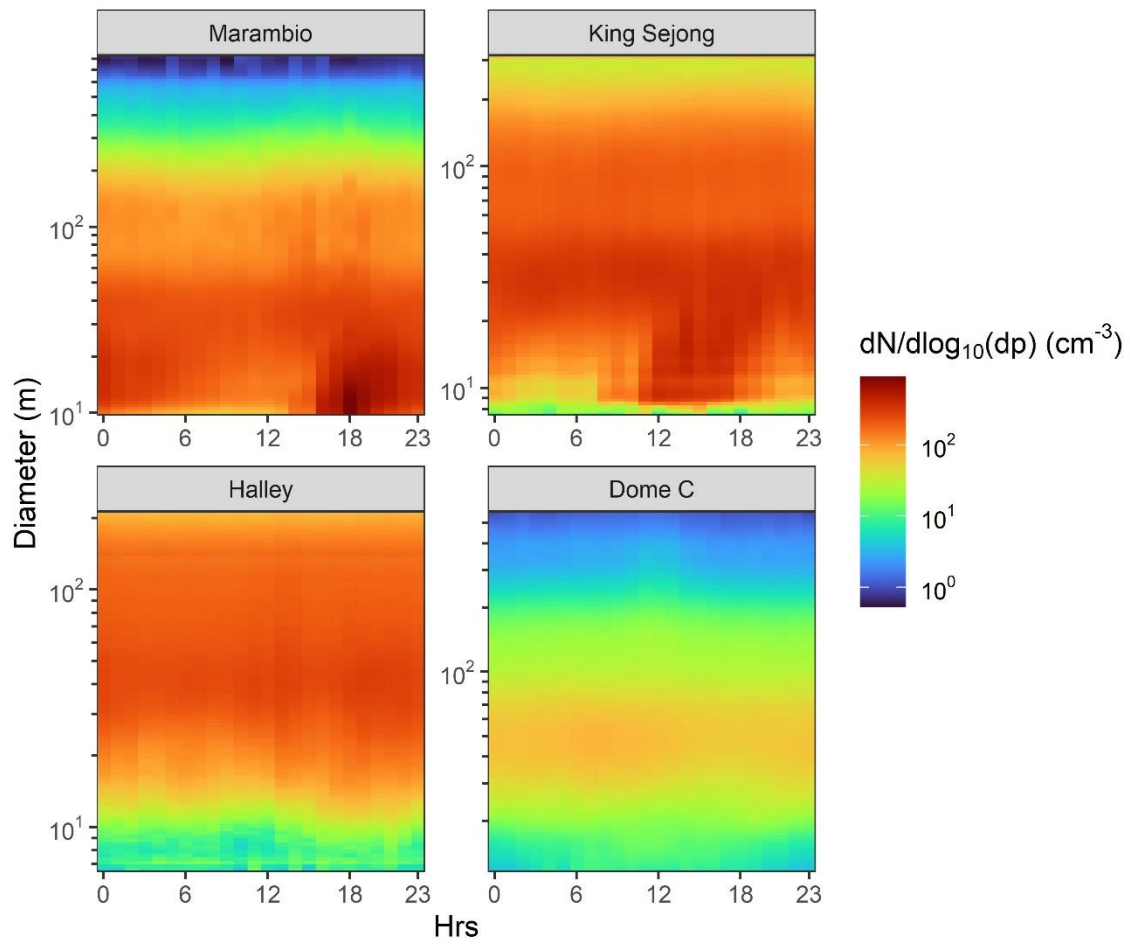

Figure S3: Mean 24-hour particle number PNSD contour plots for each of the four Antarctic sites in this study

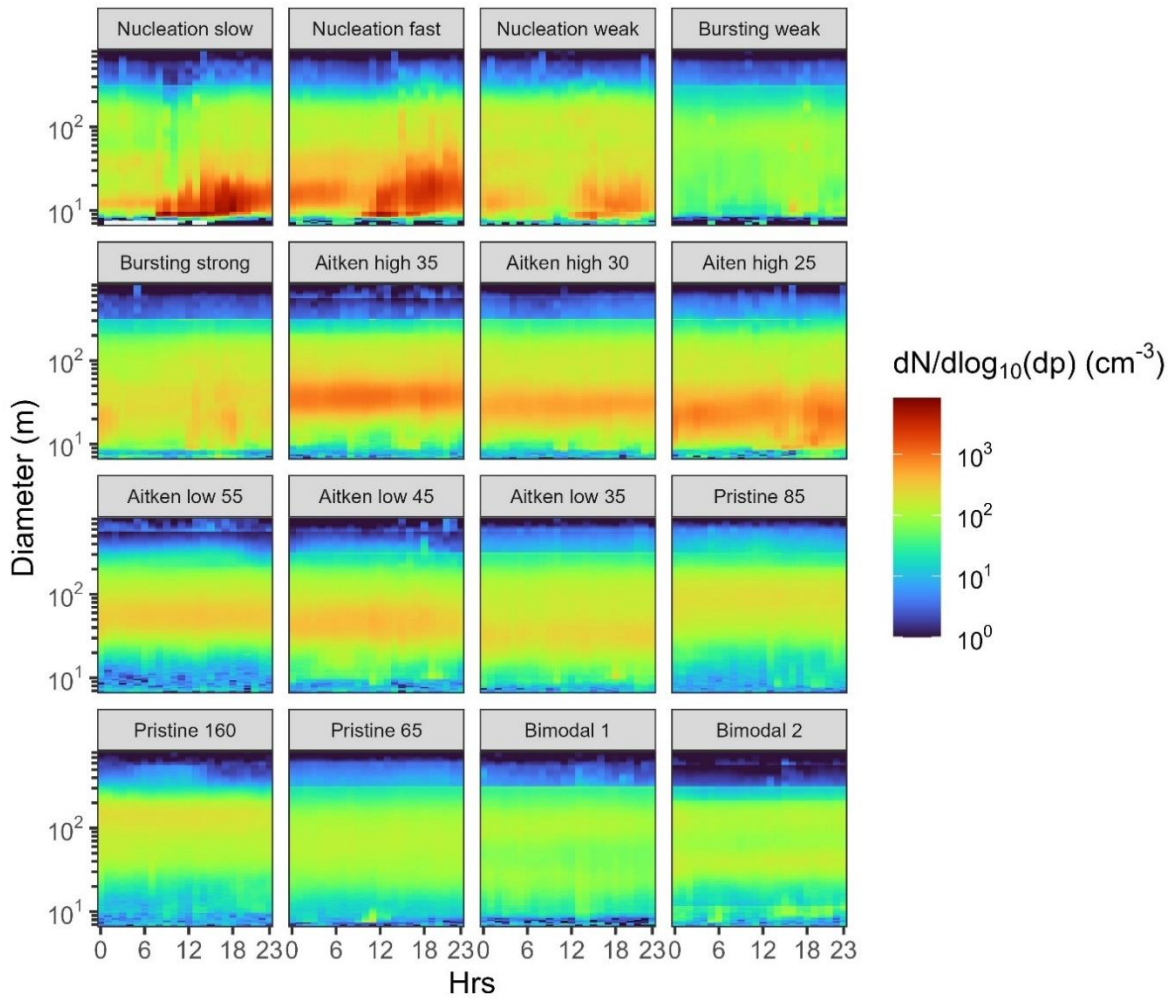

Figure S4: Mean diurnal cycle in the PNSD for all of the 16 clusters.

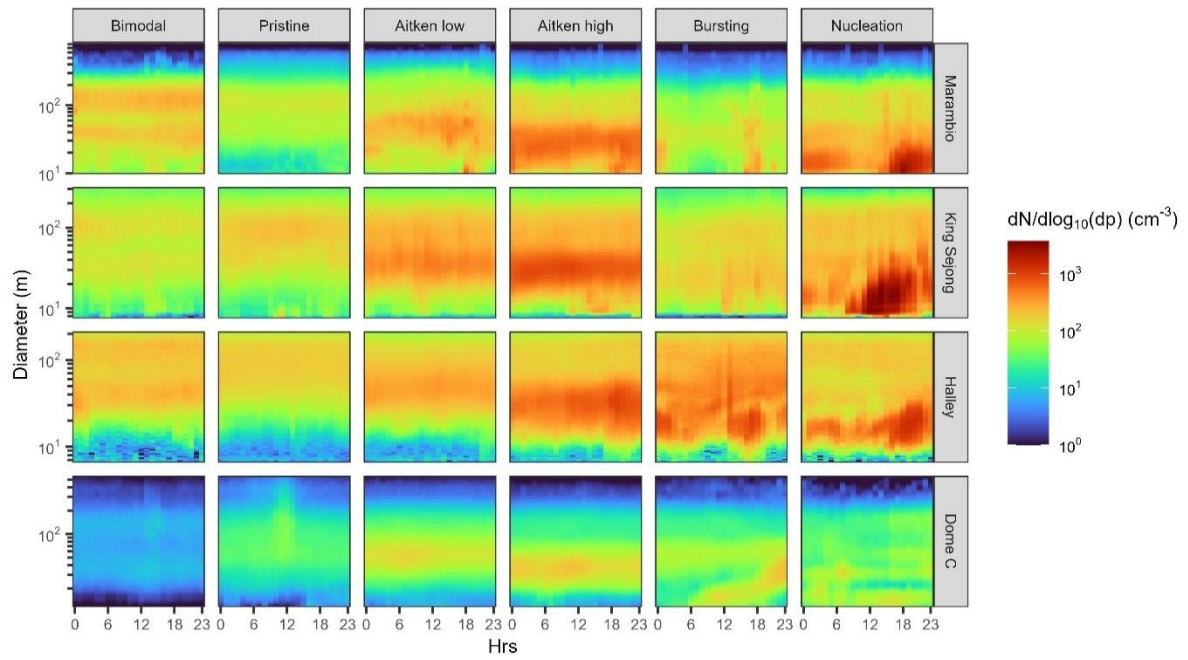

Figure S5: Mean diurnal cycle in the PNSD for each of the four Antarctic sites in this study, separated by clusters.



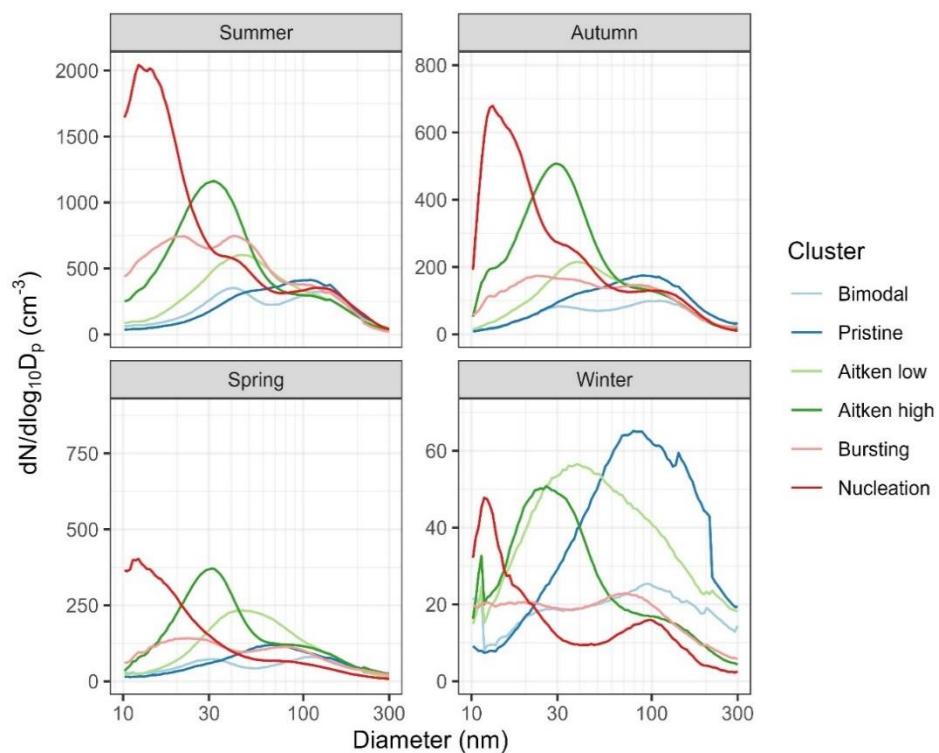

Figure S6: PNSD clusters separated by Austral season. Range 10 – 300 nm shown (where data is common between sites). Summer: December to February; Autumn: March to May; Winter: June to August; Spring: September to November

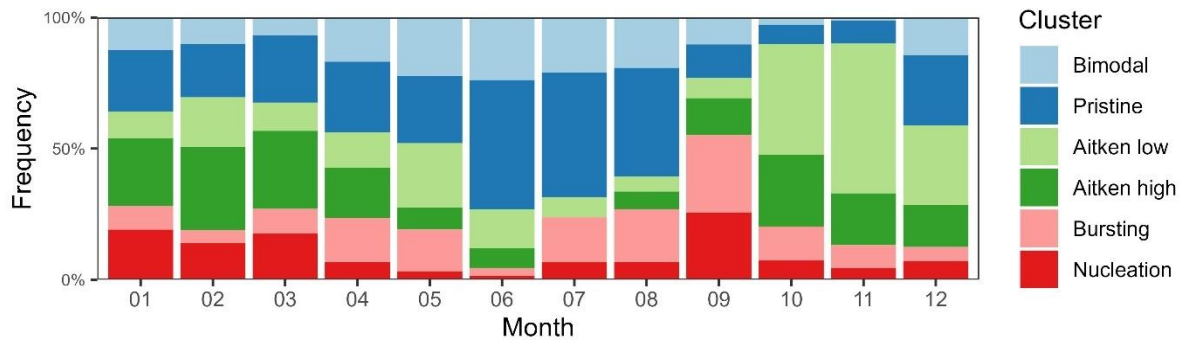

Figure S7: Relative mean monthly contribution of each cluster per month across all sites

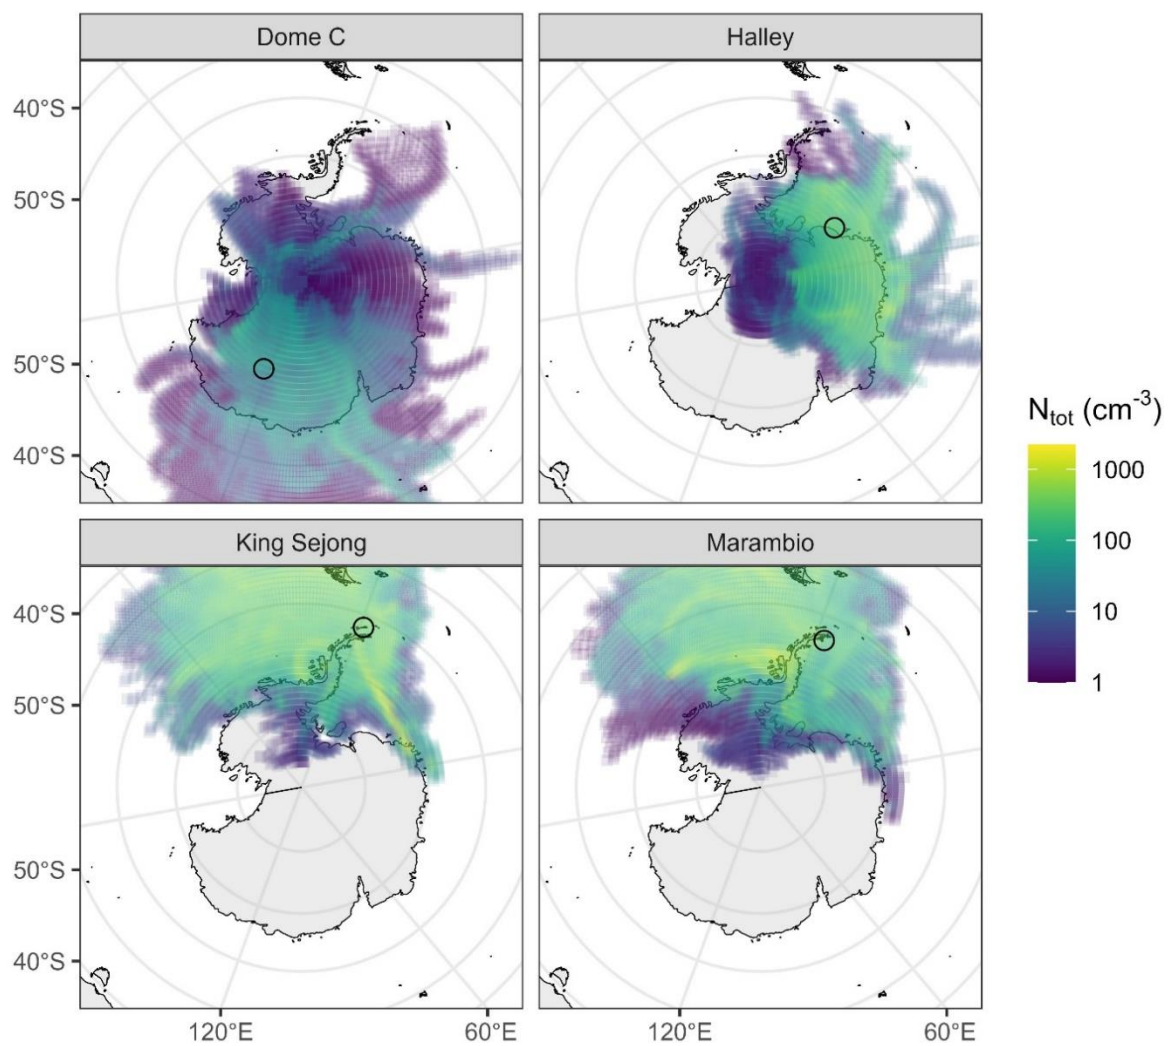

Figure S8: Particle number CWTs of 72 hour air mass trajectories for each site. Trajectories calculated with HYSPLIT.

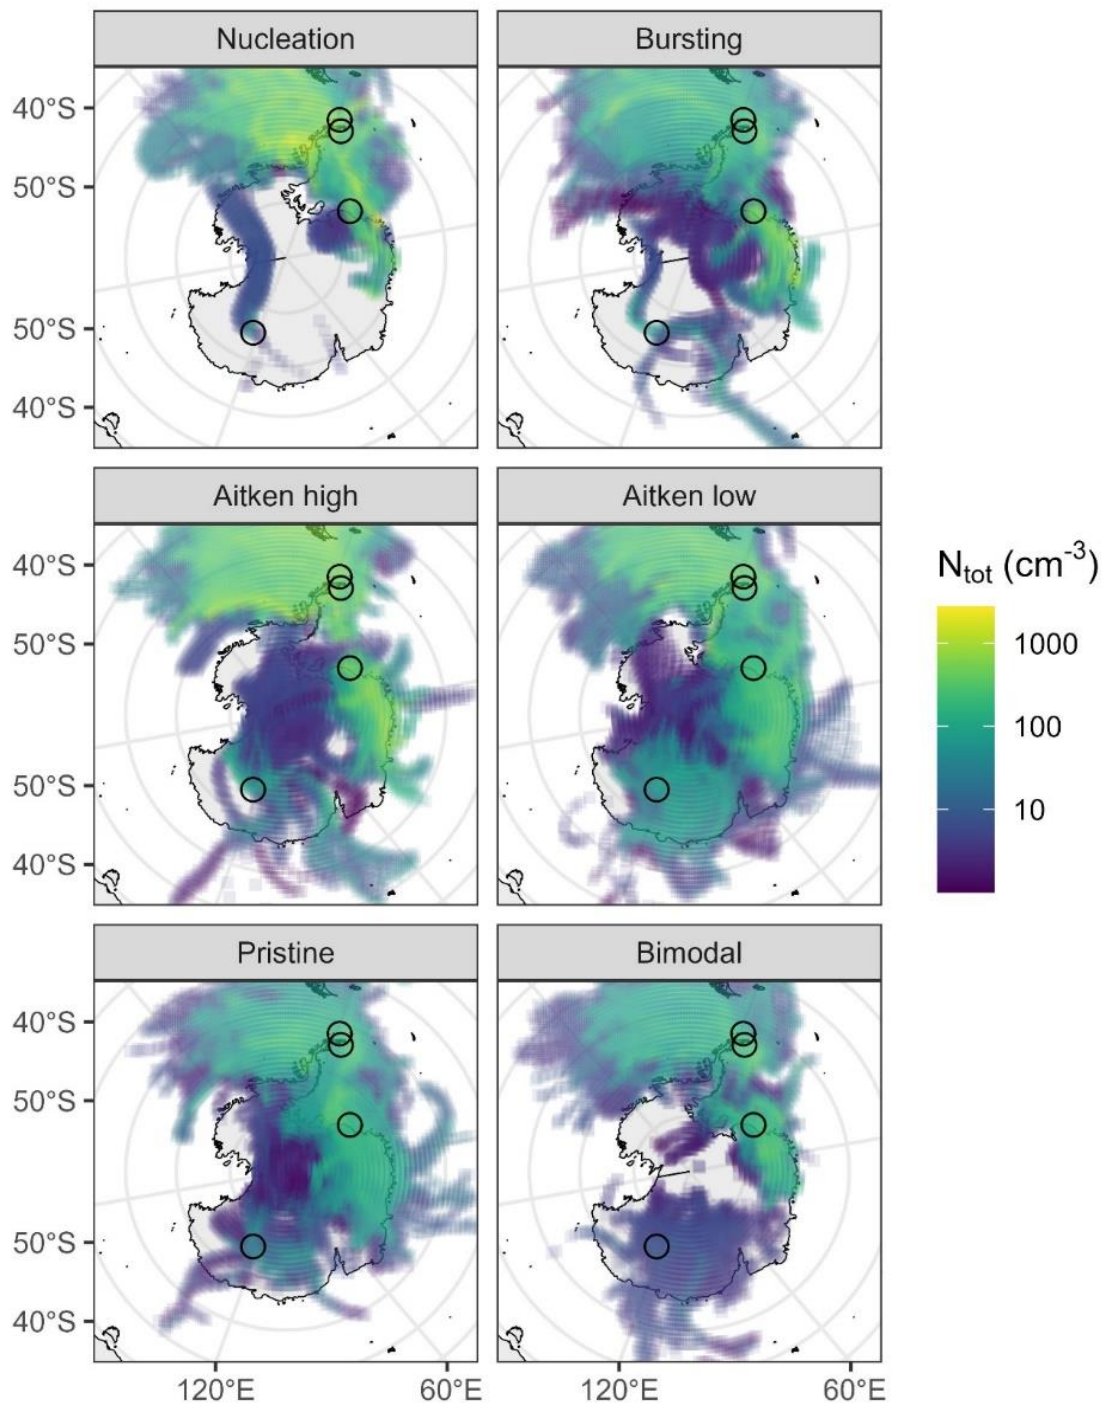

Figure S9: Particle number CWTs of 72 hour air mass trajectories for each cluster when each site is combined. Trajectories calculated with HYSPLIT.



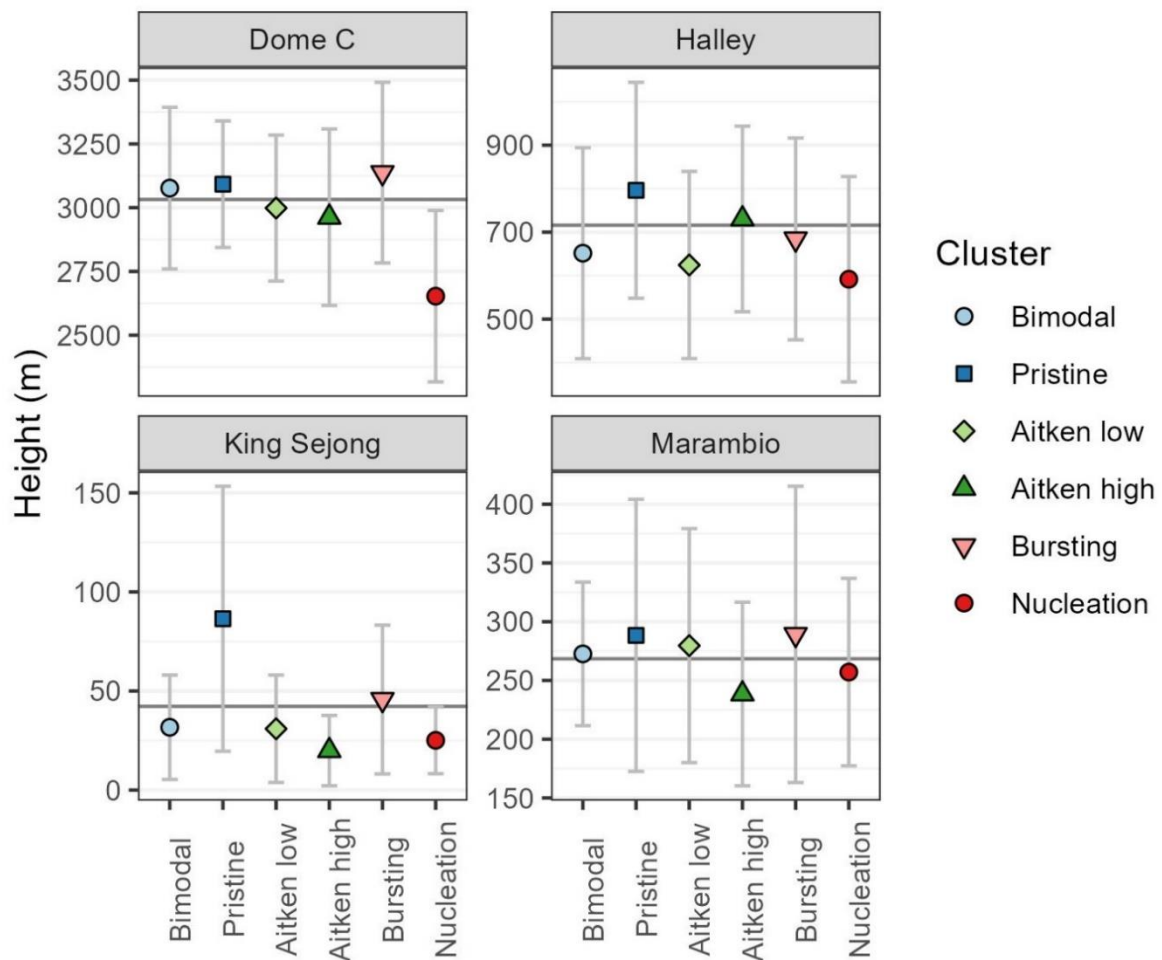

Figure S10: Mean trajectory height for 72 hour back trajectories per cluster per site. Error bars indicate 1 standard error. Horizontal line represents mean trajectory height. Trajectories calculated with HYSPLIT.
